# Supplementary material for: Hispanic/Latinos and non-Hispanic whites’ childhood cancer survivors and parents: a dyadic analysis of coping resources and mental health
Source: Springer Nature journal article supplement (doi:10.1007/s11764-023-01339-8), 2023-02-28
Supplement: 11764_2023_1339_MOESM1_ESM.pdf [file 11764_2023_1339_MOESM1_ESM.pdf]

**Title: Hispanic/Latinos and non-Hispanic whites' childhood cancer survivors and parents: A dyadic analysis of coping resources and mental health**

Journal: Journal of Cancer Survivorship

Authors: Carol Y. Ochoa<sup>1</sup>, Junhan Cho<sup>1</sup>, Kimberly A. Miller<sup>1,2</sup>, Lourdes Baezconde-Garbanati<sup>1</sup>, Randall Y. Chan<sup>3</sup>, Albert J. Farias<sup>1</sup>, Joel E. Milam<sup>4</sup>

Affiliations:

<sup>1</sup> Department of Population and Public Health Sciences, Keck School of Medicine, University of Southern California, Los Angeles, CA, USA

<sup>2</sup> Department of Dermatology, Keck School of Medicine, University of Southern California, Los Angeles, CA, USA

<sup>3</sup> Department of Pediatrics, Keck School of Medicine, University of Southern California, Los Angeles, CA, USA

<sup>4</sup> Department of Epidemiology and Biostatistics, Department of Medicine, University of California, Irvine, Irvine, CA, USA

**Corresponding author:** Carol Y. Ochoa, PhD, MPH, 2001 N. Soto Street, 3<sup>rd</sup> Floor, Room 312-30 Los Angeles, CA 90032; [caroloch@usc.edu](mailto:caroloch@usc.edu)

**Supplemental Figure 1.** Conceptual models of dyadic influences of social support, religiosity, and spirituality on depressive symptoms.

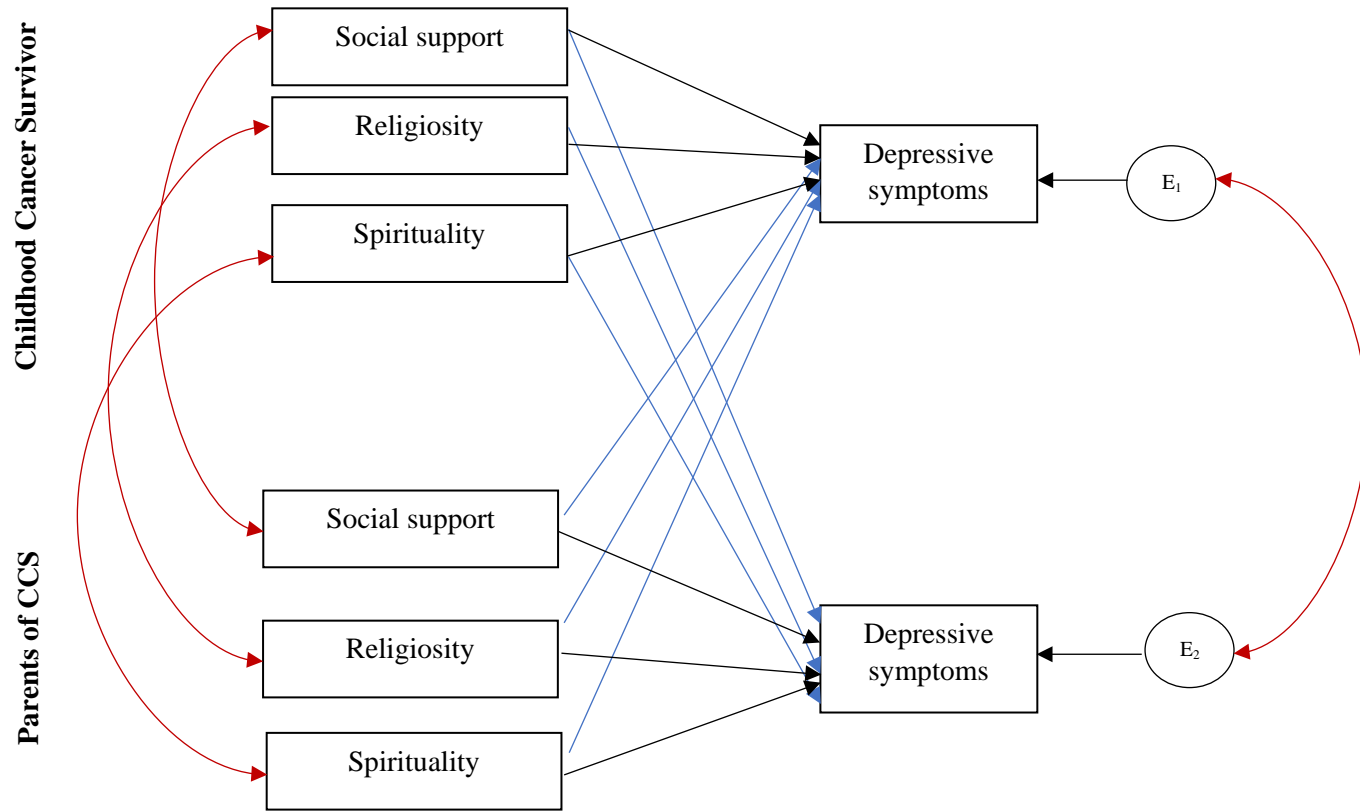

Note. Solid black lines represent actor effects, solid blue lines represent partner effects, and curved lines with a double-headed arrow represent correlated variables. For simplicity purposes, the conceptual model omitted CCS age at survey, treatment intensity, and Hispanic ethnicity as covariates for Aim 1. Additionally, the model omits illustrating the moderating effects of Hispanic ethnicity for Aim 3.

**Supplemental Figure 2.** Conceptual models of dyadic influences of social support, religiosity, and spirituality on perceived stress.

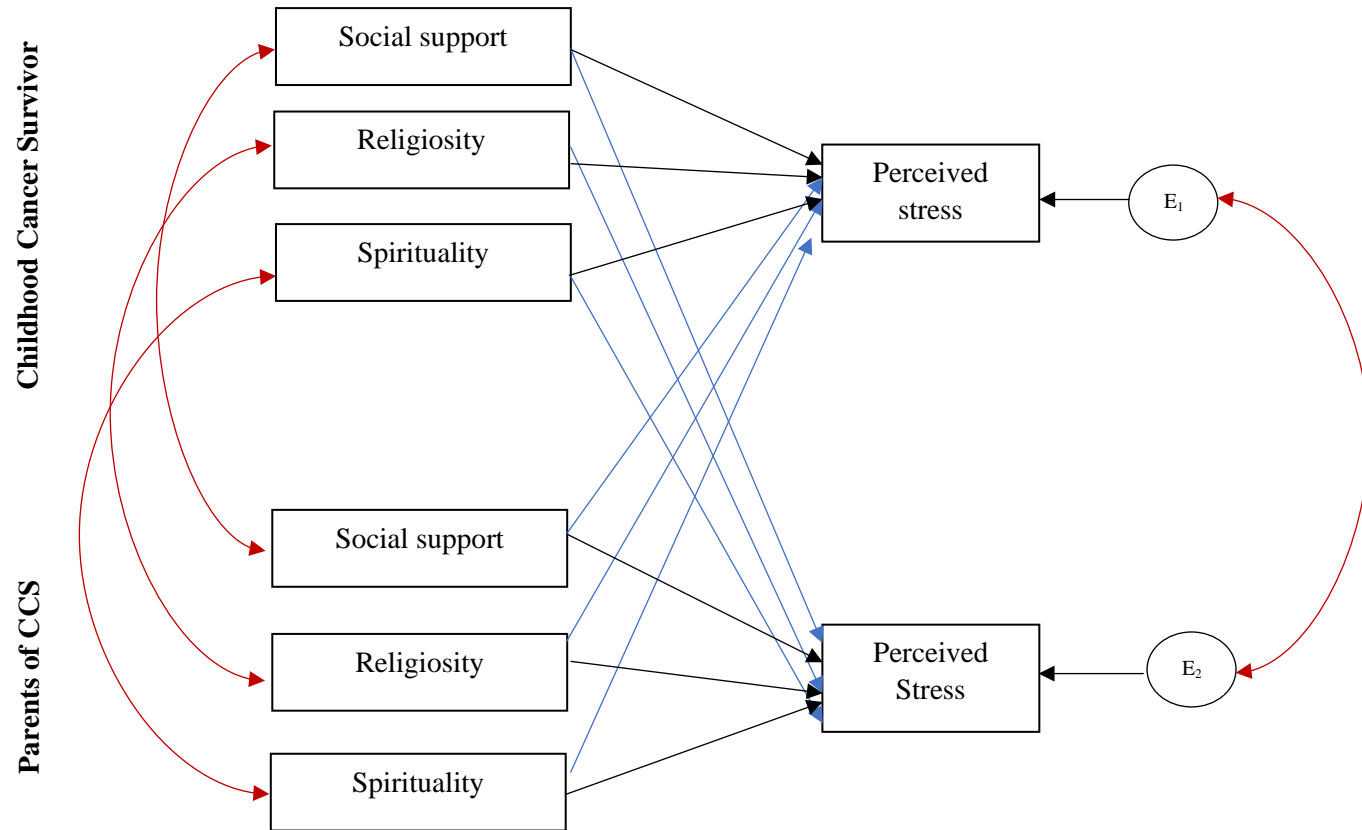

Note. Solid black lines represent actor effects, solid blue lines represent partner effects, and curved lines with a double-headed arrow represent correlated variables. For simplicity purposes, the conceptual model omitted CCS age at survey, treatment intensity, and Hispanic ethnicity as covariates for Aim 2. Additionally, the model omits illustrating the moderating effects of Hispanic ethnicity for Aim 3.

**Supplemental Table 1.** CCS and Parent demographic information by Hispanic ethnicity

| Variables                                 | Overall Dyads (n=160) |        |        |        | Hispanic Dyads (n=91) |        |        |        | Non-Hispanic Dyads (n=69) |        |        |        |
|-------------------------------------------|-----------------------|--------|--------|--------|-----------------------|--------|--------|--------|---------------------------|--------|--------|--------|
|                                           | CCS                   |        | Parent |        | CCS                   |        | Parent |        | CCS                       |        | Parent |        |
| Age at survey (years) <sup>a</sup>        | 20.29                 | (2.80) | 48.23  | (6.15) | 20.14                 | (2.66) | 46.60  | (6.00) | 20.59                     | (3.08) | 51.58  | (6.57) |
| Gender <sup>b</sup>                       |                       |        |        |        |                       |        |        |        |                           |        |        |        |
| Male                                      | 79                    | 49%    | 18     | 11%    | 46                    | 51%    | 8      | 9%     | 33                        | 48%    | 10     | 15%    |
| Female                                    | 81                    | 51%    | 141    | 89%    | 45                    | 49%    | 83     | 91%    | 36                        | 52%    | 58     | 85%    |
| Cancer site <sup>b</sup>                  |                       |        | --     | --     |                       |        | --     | --     |                           |        | --     | --     |
| Leukemia                                  | 48                    | 30%    |        |        | 30                    | 33%    |        |        | 18                        | 26%    |        |        |
| Brain                                     | 27                    | 17%    |        |        | 12                    | 13%    |        |        | 15                        | 22%    |        |        |
| Bone                                      | 10                    | 6%     |        |        | 7                     | 8%     |        |        | 3                         | 4%     |        |        |
| Lymphoma                                  | 31                    | 19%    |        |        | 17                    | 19%    |        |        | 14                        | 20%    |        |        |
| Other                                     | 44                    | 28%    |        |        | 25                    | 27%    |        |        | 19                        | 28%    |        |        |
| Time since diagnosis (years) <sup>a</sup> | 7.41                  | (2.13) | --     | --     | 7.33                  | (2.19) | --     | --     | 7.57                      | (2.03) | --     | --     |
| Treatment intensity <sup>b</sup>          |                       |        | --     | --     |                       |        | --     | --     |                           |        | --     | --     |
| 1                                         | 16                    | 10%    |        |        | 8                     | 9%     |        |        | 8                         | 12%    |        |        |
| 2                                         | 52                    | 33%    |        |        | 32                    | 35%    |        |        | 20                        | 29%    |        |        |
| 3                                         | 76                    | 48%    |        |        | 40                    | 44%    |        |        | 36                        | 53%    |        |        |
| 4                                         | 15                    | 9%     |        |        | 11                    | 12%    |        |        | 4                         | 6%     |        |        |
| Educational Level <sup>b</sup>            |                       |        |        |        |                       |        |        |        |                           |        |        |        |
| <12 years                                 | 61                    | 38%    | 55     | 35%    | 37                    | 41%    | 51     | 57%    | 24                        | 35%    | 4      | 6%     |
| High school graduate/GED                  | 29                    | 18%    | 21     | 13%    | 22                    | 24%    | 15     | 17%    | 7                         | 10%    | 6      | 9%     |
| >12 years                                 | 69                    | 43%    | 82     | 52%    | 31                    | 34%    | 24     | 27%    | 38                        | 55%    | 58     | 68%    |
| Socioeconomic status <sup>b</sup>         | --                    | --     |        |        | --                    | --     |        |        | --                        | --     |        |        |
| Low                                       |                       |        | 75     | 47%    |                       |        | 67     | 74%    |                           |        | 8      | 12%    |
| Middle/High                               |                       |        | 85     | 53%    |                       |        | 24     | 26%    |                           |        | 61     | 88%    |

Note: <sup>a</sup> Mean and standard deviation; <sup>b</sup> number and percentage.

**Supplemental Table 2.** Mean, standard deviation, and correlations of parent and childhood cancer survivors study variables and covariates for overall sample

|                               | 1       | 2       | 3        | 4        | 5       | 6       | 7     | 8      | 9       | 10      | 11    | 12    | 13   |
|-------------------------------|---------|---------|----------|----------|---------|---------|-------|--------|---------|---------|-------|-------|------|
| Mean                          | 1.61    | 2.49    | 1.31     | 15.63    | 5.67    | 1.24    | 1.87  | 1.53   | 14.35   | 5.29    | 2.57  | 20.34 | 0.56 |
| SD                            | 0.62    | 1.38    | 0.71     | 12.71    | 3.54    | 0.73    | 1.42  | 0.5    | 11.65   | 3.16    | 0.80  | 2.85  | 0.50 |
| Paired t-test <sup>a</sup>    | <0.001  | <0.001  | 0.0006   | 0.3812   | 0.3089  | --      | --    | --     | --      | --      | --    | --    | --   |
| 1. Parent spirituality        | 1.00    |         |          |          |         |         |       |        |         |         |       |       |      |
| 2. Parent religiosity         | 0.60*** | 1.00    |          |          |         |         |       |        |         |         |       |       |      |
| 3. Parent social support      | -0.16*  | 0.03    | 1.00     |          |         |         |       |        |         |         |       |       |      |
| 4. Parent depressive symptoms | 0.19*   | 0.08    | -0.33*** | 1.00     |         |         |       |        |         |         |       |       |      |
| 5. Parent perceived stress    | 0.18*   | 0.07    | -0.27*** | 0.78***  | 1.00    |         |       |        |         |         |       |       |      |
| 6. CCS spirituality           | 0.30*** | 0.28*** | -0.09    | 0.13†    | 0.05    | 1.00    |       |        |         |         |       |       |      |
| 7. CCS religiosity            | 0.26*** | 0.56*** | 0.12     | -0.01    | -0.04   | 0.56*** | 1.00  |        |         |         |       |       |      |
| 8. CCS social support         | -0.04   | -0.03   | 0.31***  | -0.30*** | -0.22** | -0.15†  | 0.02  | 1.00   |         |         |       |       |      |
| 9. CCS depressive symptoms    | 0.11    | 0.10    | -0.09    | 0.33***  | 0.27*** | 0.07    | -0.03 | -      | 0.29*** | 1.00    |       |       |      |
| 10. CCS perceived stress      | 0.05    | 0.08    | -0.02    | 0.15†    | 0.15†   | 0.03    | -0.03 | -      | 0.22*** | 0.73*** | 1.00  |       |      |
| 11. CCS treatment Intensity   | 0.21**  | -0.03   | 0.04     | 0.01     | -0.03   | 0.06    | 0.002 | 0.001  | 0.07    | 0.06    | 1.00  |       |      |
| 12. CCS age                   | -0.04   | -0.10   | 0.06     | -0.04    | -0.08   | -0.02   | -0.10 | -0.05  | 0.03    | 0.02    | -0.09 | 1.00  |      |
| 13. Hispanic ethnicity        | 0.25**  | 0.27*** | -0.19*   | 0.23**   | 0.09    | 0.17*   | 0.11  | -0.14† | 0.10    | 0.10    | 0.04  | -0.08 | 1.00 |

Abbreviations. CCS: Childhood cancer survivors; SD: standard deviation

Notes: Depressive symptom values are self-reported depressive symptom total scores on the Center for Epidemiological Studies Depression Scale; and Perceived stress values are self-reported total scores on Perceived Stress Scale for parents and childhood cancer survivors, respectively.

\*\*\*  $p < 0.001$ ; \*\*  $p < 0.01$ ; \*  $p < 0.05$ ; †  $p < 0.10$

<sup>a</sup> Paired sample t-test between the same independent and dependent variables of parent and CCS (e.g., parent depressive symptoms and CCS depressive symptoms)

**Supplemental Table 3.** Distribution of predictors and outcomes by Hispanic ethnicity

|                     | <b>Hispanic Dyads (n=91)<sup>a</sup></b> |                | <b>Non-Hispanic Dyads<sup>a</sup> (n=69)</b> |                |
|---------------------|------------------------------------------|----------------|----------------------------------------------|----------------|
|                     | CCS                                      | Parent         | CCS                                          | Parent         |
| <b>Predictors</b>   |                                          |                |                                              |                |
| Social support      | 1.45 (0.58)†                             | 1.19 (0.71)*   | 1.62 (0.60)†                                 | 1.46 (0.70)*   |
| Religiosity         | 2.01 (1.49)                              | 2.79 (1.30)*   | 1.69 (1.30)                                  | 2.03 (1.38)*   |
| Spirituality        | 1.35 (0.72)*                             | 1.74 (0.49)*   | 1.10 (0.73)*                                 | 1.43 (0.72)*   |
| <b>Outcomes</b>     |                                          |                |                                              |                |
| Depressive symptoms | 15.35 (11.97)                            | 18.20 (13.00)* | 13.06 (11.18)                                | 12.39 (11.64)* |
| Perceived stress    | 5.57 (2.91)                              | 5.95 (3.53)    | 4.93 (3.45)                                  | 5.32 (3.56)    |

<sup>a</sup> Comparing CCS predictors or outcomes by Hispanic ethnicity and parent predictors or outcomes by Hispanic ethnicity.

\*p<0.05; †p<0.10
